# Supplementary material for: Advising Student-Driven Analytics Projects: A Summary of Experiences and Lessons Learned
Source: Atypon-hosted journal article supplement (doi:10.1287/ited.2022.0275), 2022-08-26
Supplement: ited.2022.0275.sm1.pdf [file ited.2022.0275.sm1.pdf]

## Project Proposal Rubric (out of 10)

Fall 2021

---

|                                         | <b>Insufficient</b>                                                                                     | <b>Satisfactory</b>                                                                                                                                         | <b>Good</b>                                                                                                                                          | <b>Excellent</b>                                                                                                                                                                                                                              |
|-----------------------------------------|---------------------------------------------------------------------------------------------------------|-------------------------------------------------------------------------------------------------------------------------------------------------------------|------------------------------------------------------------------------------------------------------------------------------------------------------|-----------------------------------------------------------------------------------------------------------------------------------------------------------------------------------------------------------------------------------------------|
| <b>Project Data and Methodology (4)</b> | Data source(s) are not proposed.<br>No clear plan for project completion.                               | Data source is typical.<br>Methodology is a simple application of an approach discussed in class.                                                           | Data drawn from multiple sources or single source and somewhat challenging to use.<br>Methodology is an extension of an approach discussed in class. | Data drawn from multiple sources or single source and will be challenging to use.<br>Methodology combines multiple components (e.g., prediction and optimization) or rigorously compares different approaches and go well beyond lab content. |
| <b>Creativity/Originality (3)</b>       | Idea is inappropriate.<br>Data and methodology are not relevant for the problem. No suggested outcomes. | Idea is borrowed or standard and not well-motivated.<br>Data and methodology somewhat capture the problem and proposed outcomes are expected or unoriginal. | Idea is appropriate and somewhat well-motivated.<br>Data and methodology mostly capture the problem, and the proposed outcomes are relevant.         | Idea is interesting and well-motivated.<br>Data and methodology fully capture the problem, and the proposed outcomes are relevant and novel.                                                                                                  |
| <b>Writing Quality (3)</b>              | Incoherent with numerous grammatical errors and a lack of structure.                                    | Partially clear with regular grammatical errors. Poorly structured.                                                                                         | Mostly clear with some grammatical errors. Well structured.                                                                                          | Very clear with almost no grammatical errors. Very well structured.                                                                                                                                                                           |

## Preliminary Report Rubric (out of 15)

(Fall 2021)

|                                      | <b>Insufficient</b>                                                                                                                        | <b>Satisfactory</b>                                                                                                                                           | <b>Good</b>                                                                                                                                      | <b>Excellent</b>                                                                                                                                                     |
|--------------------------------------|--------------------------------------------------------------------------------------------------------------------------------------------|---------------------------------------------------------------------------------------------------------------------------------------------------------------|--------------------------------------------------------------------------------------------------------------------------------------------------|----------------------------------------------------------------------------------------------------------------------------------------------------------------------|
| <b>Exploratory Data Analysis (5)</b> | <p>Inappropriate/ insufficient dataset. Data is not appropriately cleaned.</p> <p>EDA Analysis is irrelevant to the main problem</p>       | <p>Appropriate but insufficient dataset. Data has been somewhat transformed for the problem</p> <p>Contains superficial EDA insights</p>                      | <p>Appropriate dataset. Data has been appropriately transformed for the problem.</p> <p>Contains some EDA insights to guide the model</p>        | <p>Unique dataset. Data has been perfectly transformed for the problem.</p> <p>Contains many interesting EDA insights to guide the model</p>                         |
| <b>Initial Model (3)</b>             | <p>Methods are both infeasible &amp; inappropriate.</p> <p>Modelling is irrelevant to the main problem</p>                                 | <p>Methods are insufficient to answering the problem or incorrectly applied.</p> <p>Contains superficial insights</p>                                         | <p>Methods are appropriate for the problem &amp; mostly correct.</p> <p>Contains some insights</p>                                               | <p>Methods are thought-out, ideal for the problem, &amp; correct.</p> <p>Contains many interesting insights</p>                                                      |
| <b>Next Steps (3)</b>                | <p>Unclear plan going forwards. Not connected to the EDA OR initial results</p> <p>No suggestions for model improvements or extensions</p> | <p>Somewhat clear plan going forwards, somewhat guided by the EDA or initial results</p> <p>Unreasonable suggestions for model improvements or extensions</p> | <p>Mostly clear plan going forwards guided by the EDA or initial results.</p> <p>Reasonable suggestions for model improvements or extensions</p> | <p>Completely clear and well motivated plan going forward guided by the EDA and initial results</p> <p>Creative suggestions for model improvements or extensions</p> |
| <b>Writing Quality (4)</b>           | <p>Incoherent with numerous grammatical errors and a complete lack of structure/flow</p> <p>Diagrams are nonexistent or unclear.</p>       | <p>Partially clear with regular grammatical errors. Poorly structured with little flow</p> <p>Diagrams are not relevant or labelled.</p>                      | <p>Mostly clear with some grammatical errors. Decently structured and decent flow.</p> <p>Diagrams are relevant but sometimes unclear.</p>       | <p>Very clear with no grammatical errors. Well structured and strong flow.</p> <p>Diagrams are relevant, labelled and clear.</p>                                     |

## Abstract Rubric (out of 5)

Fall 2021

---

|                                  | <b>Insufficient</b>                                                                                                                                 | <b>Satisfactory</b>                                                                                                                       | <b>Good</b>                                                                                                                                  | <b>Excellent</b>                                                                                                                                         |
|----------------------------------|-----------------------------------------------------------------------------------------------------------------------------------------------------|-------------------------------------------------------------------------------------------------------------------------------------------|----------------------------------------------------------------------------------------------------------------------------------------------|----------------------------------------------------------------------------------------------------------------------------------------------------------|
| <b>Writing (3)</b>               | Poorly written with many errors.<br>Problem setup & conclusion are inappropriate or missing.<br>Formatting & length instructions were not followed. | Written with some errors.<br>Problem & conclusion are not well-motivated or connected.<br>Formatting & length instructions were followed. | Mostly well written with minor errors.<br>Problem is somewhat motivated.<br>Conclusions are correct but do not tie back to the main problem. | Very well written with no errors.<br>Problem is clearly written and well-motivated.<br>Conclusions are correct and tie results back to the main problem. |
| <b>Methods &amp; Results (2)</b> | Methods & results are inappropriate, missing, or poorly described.                                                                                  | Methods & results are appropriate, but missing key parts.                                                                                 | Methods are appropriate for the problem.<br>Results are included, but does not connect to the methods.                                       | Methods are clear and relevant.<br>Key results are included and connect to the methods described.                                                        |

## Presentation Rubric (out of 25)

Fall 2021

|                                         | <b>Insufficient</b>                                                                                                                               | <b>Satisfactory</b>                                                                                                                                                     | <b>Good</b>                                                                                                                                | <b>Excellent</b>                                                                                                                                                     |
|-----------------------------------------|---------------------------------------------------------------------------------------------------------------------------------------------------|-------------------------------------------------------------------------------------------------------------------------------------------------------------------------|--------------------------------------------------------------------------------------------------------------------------------------------|----------------------------------------------------------------------------------------------------------------------------------------------------------------------|
| <b>Presentation of the problem (5)</b>  | Problem is inappropriate and poorly described.                                                                                                    | Problem is somewhat appropriate, but not well described or motivated.                                                                                                   | Problem is appropriate and well described and motivated.                                                                                   | Problem is well introduced, and convincingly motivated and concluded.                                                                                                |
| <b>Methods &amp; implementation (6)</b> | Methods are presented with excessive or limited detail.<br><br>No graphics are used to enhance explanations.                                      | Portions of the methods are presented with sufficient detail.<br><br>Few graphics are used to enhance explanations.                                                     | Methods are presented with appropriate detail and justification.<br><br>Some graphics are used to enhance explanations.                    | Methods are clearly presented with detail and convincing justification.<br><br>Graphics are used to greatly enhance explanations.                                    |
| <b>Evaluation (6)</b>                   | Evaluation metrics are unclear or are not mentioned.<br><br>Results are not presented.                                                            | Evaluation metrics are somewhat clear and may be inappropriate for the problem.<br><br>Results are unclear or difficult to interpret. Some weak benchmarks are present. | Evaluation metrics are mostly clear and appropriate for the problem.<br><br>Results are reported with benchmarks and appropriate analysis. | Evaluation metrics are clear and appropriate.<br><br>Results are clearly reported with benchmarks. Thorough analysis highlights strengths and weaknesses of methods. |
| <b>Delivery (5)</b>                     | No members speak clearly or are easy to understand.<br><br>All questions are answered inappropriately.                                            | Some members speak clearly, are well-paced, and are easy to understand.<br><br>Some questions are answered appropriately.                                               | Most members speak clearly, are well-paced, and are easy to understand.<br><br>Most questions are well-received and answered.              | All members speak clearly, well-paced, and are easy to understand.<br><br>All answers demonstrate clear understanding of the work.                                   |
| <b>Organization (3)</b>                 | Very few slides are aesthetically pleasing.<br><br>Presentation is not 5 minutes 20 seconds long, or slides do not auto advance every 20 seconds. | Some slides are aesthetically pleasing.<br><br>Presentation is 5 minutes and 20 seconds long, and slides auto advance every 20 seconds. (i.e., follows PK format)       | Most slides are aesthetically pleasing.<br><br>Information on most slides is appropriate for 20 second auto advancing slides.              | All slides are aesthetically pleasing.<br><br>Information on all slides are concise and clear to follow in PK setting.                                               |

# Final Report Rubric (out of 45)

Fall 2021

## Final Report Rubric (out of 45)

|                                                        | <b>Insufficient</b>                                                                                                                | <b>Satisfactory</b>                                                                                                                                                     | <b>Good</b>                                                                                                                                                                                 | <b>Excellent</b>                                                                                                                                                                    |
|--------------------------------------------------------|------------------------------------------------------------------------------------------------------------------------------------|-------------------------------------------------------------------------------------------------------------------------------------------------------------------------|---------------------------------------------------------------------------------------------------------------------------------------------------------------------------------------------|-------------------------------------------------------------------------------------------------------------------------------------------------------------------------------------|
| <b>Problem Setup (5)</b>                               | Problem is inappropriate & poorly described.                                                                                       | Problem is somewhat appropriate, but not described clearly or well-motivated.                                                                                           | Problem is appropriate, understandable, and well-motivated.                                                                                                                                 | Problem is interesting, described clearly, & convincingly well-motivated.                                                                                                           |
| <b>Data Collection &amp; Exploratory Analysis (10)</b> | Data is inappropriate for this problem or has not been appropriately cleaned.                                                      | Data has been somewhat transformed to be relevant for the problem.<br><br>Exploratory analysis is superficial & not useful.                                             | Data collection/transformation is appropriate.<br><br>Exploratory analysis gives useful insights to the problem.                                                                            | Data collection/transformation is perfect for the problem.<br><br>Exploratory analysis reveals insights that are later used to produce better methods.                              |
| <b>Methods &amp; Implementation (10)</b>               | Methods are both infeasible & inappropriate.<br><br>No validation, parameter tuning, or sensitivity analysis.                      | Methods are insufficient to answer the problem or incorrectly applied.<br><br>Limited validation, parameter tuning, or sensitivity analysis.                            | Methods are appropriate for the problem & mostly correct.<br><br>Models have had some validation, parameter tuning, and sensitivity analysis.                                               | Methods are thought-out, ideal for the problem, & correct.<br><br>Models are properly validated with parameter tuning & sensitivity analysis.                                       |
| <b>Insights (10)</b>                                   | No quantitative analysis and the model performs poorly.<br><br>No high-level insights are drawn from the analysis.                 | Some quantitative analysis is given, or the model does not perform very well and weaknesses are not identified.<br><br>High-level insights are not relevant.            | Quantitative analysis is given. Model performs somewhat well relative to the task. Some weaknesses are explained.<br><br>Analysis yields one interesting, high-level insight.               | Quantitative analysis is given. Model performs very well relative to the task. Any weaknesses are explained.<br><br>Analysis yields multiple interesting, high-level insights.      |
| <b>Summary (5)</b>                                     | The main question was not answered. No meaningful next steps are suggested.                                                        | Analysis & results suggest the main problem was partially answered. Some next steps are suggested.                                                                      | Analysis & results conclude the main problem was appropriately answered. Relevant next steps suggested.                                                                                     | Analysis & results conclude the main problem was answered successfully. Interesting next steps given.                                                                               |
| <b>Presentation &amp; Writing (5)</b>                  | Writing is mostly unclear with major errors. Diagrams are non-existent or unclear.<br><br>Does not follow formatting instructions. | Writing is at times unclear with multiple typos. Diagrams are not relevant or labelled.<br><br>Does not follow most formatting instructions. Clear abuse of appendices. | Writing is mostly clear. Minor typos. Diagrams are relevant but sometimes unclear.<br><br>Follows most formatting instructions. Appendices (if included) are somewhat necessary & relevant. | Writing is consistently clear & correct. Diagrams are relevant, labelled, and clear.<br><br>Follows all formatting instructions. Appendices (if included) are necessary & relevant. |
